# Supplementary material for: A facile route to end-functionalised polymers synthesised by SET-LRP via a one-pot reduction/thiol-ene Michael-type addition
Source: Royal Society of Chemistry journal article supplement (doi:10.1039/c0cc02395g), 2010-01-01

## Electronic Supporting Information

### **A facile route to end-functionalised polymers synthesised by SET-LRP *via* a one-pot reduction / thiol-ene Michael-type addition**

Jay A. Syrett,<sup>a</sup> Mathew W. Jones<sup>a</sup> and David M. Haddleton\*<sup>a</sup>

## General Experimental

All chemicals were purchased from Sigma-Aldrich and used without further purification, unless otherwise stated. Size exclusion chromatography (SEC) was used to determine the molecular weight averages and the polydispersity ( $M_w/M_n$ ) with a 390-LC Varian MDS system equipped with a PL-AS RT/MT autosampler, a PL-gel 3  $\mu\text{m}$  ( $50 \times 7.5$  mm) guard column, two PL-gel 5  $\mu\text{m}$  ( $300 \times 7.5$  mm) mixed-D columns (suitable for separations up to  $M_w = 2.0 \times 10^6$  g mol<sup>-1</sup>) equipped with a differential refractive index and a UV detector, using THF–triethylamine 95:5 (v/v) as eluent with a flow rate of 1.0 mL min<sup>-1</sup>. Narrow molecular weight PMMA standards ( $1.0 \times 10^6$ –200 g mol<sup>-1</sup>) were used for calibration.

<sup>1</sup>H-NMR spectroscopy was used to determine monomer conversion. <sup>1</sup>H NMR and <sup>19</sup>F NMR spectra were recorded on Bruker DPX300, Bruker DPX400 spectrometers as solutions in perdeuterated NMR solvents. FTIR was recorded using a VECTOR-22 Bruker spectrometer using a Golden Gate diamond attenuated total reflection cell to record the infrared absorption. All matrix assisted laser desorption ionisation time of flight (MALDI-ToF) were carried out on a Bruker Ultra FLEX ToF/ToF-MS utilizing MCP for ion detection. The instrument was equipped with a nitrogen laser emitting at 337 nm and ions were accelerated through an acceleration voltage of 25 kv. The spectra shown in this work have been accumulated from typically 300-500 laser shots. The extraction delay time needed to be adjusted for higher masses to obtain the best resolution. Typical pulse extraction delay time used was 90 ns. 2-(4-Hydroxyphenylazo)benzoic acid (20 mg/mL) as the matrix with NaI salt to aid ionisation (2 mg/mL) and analyte (5 mg/mL) with reflectron mode analysis was used for all analytes. All the MALDI spectra generated were analysed using Bruker Flex Analysis software.

### (1) Synthesis of disulfide-based bifunctional initiator.

#### Bis[2-(2-bromoisobutyryloxy)ethyl] disulfide [DSDBr]

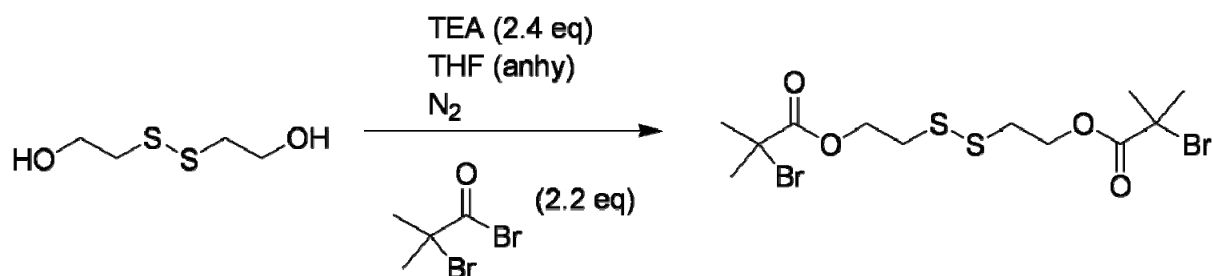

Bis(2-hydroxyethyl) disulfide (4.00 mL, 32.4 mmol) and an excess of triethylamine (9.90 mL, 71.3 mmol) was added to a 500 mL round bottom flask along with a stirrer bar, and was purged with nitrogen for 15 minutes on an ice bath. Anhydrous THF (150 mL) was cannulated into the system, and allowed to cool to 0°C. 2-Bromoisobutyryl bromide (8.40 mL, 68.1 mmol) was added dropwise under a nitrogen atmosphere via a degassed syringe, dropwise addition is essential in order to minimise the exotherm. The solution was allowed to reach ambient temperature, and left to stir for 6 hours. The resulting triethylammonium bromide salt was removed by filtration, and volatiles removed by rotary evaporation. The resulting pale yellow solution was stirred with 0.10 M aqueous Na<sub>2</sub>CO<sub>3</sub> to hydrolyze any residual 2-bromoisobutyryl bromide. The crude product was then extracted three times with dichloromethane using a separating funnel. The combined dichloromethane extracts were first dried with anhydrous magnesium sulphate, filtered, and the volatiles removed via rotary evaporation, yielding a yellow oil. The product was stored in a refrigerator. (10.1 g, 22.0 mmol, 74.1 %)

<sup>1</sup>H NMR (CDCl<sub>3</sub>): δ (ppm) 4.41 (t, 4H, *J* = 6.55), 2.95 (t, 4H, *J* = 6.55), 1.91 (s, 12H). <sup>13</sup>C

NMR (CDCl<sub>3</sub>): δ (ppm) 63.5, 55.5, 36.7, 30.7. FT-IR: 1731 cm<sup>-1</sup>, 1268 cm<sup>-1</sup>, 1153 cm<sup>-1</sup>,

1105 cm<sup>-1</sup> (νC=N) MS (EI): *m/z*+1 = 451.91 Da

## (2) Cu(0)/DSDBr catalysed polymerisation of methyl acrylate in toluene / phenol

(*poly*[MA]-SS-*poly*[MA])

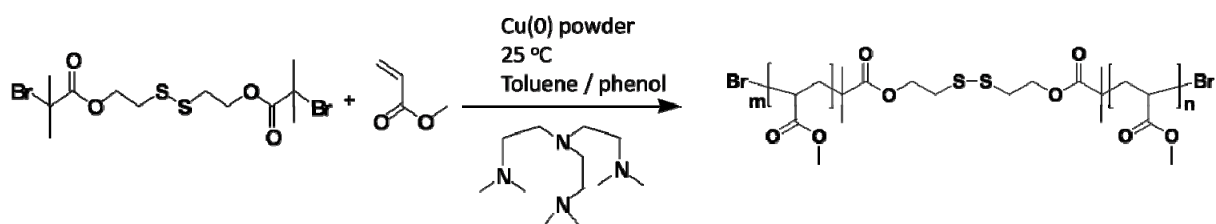

Cu(0) (0.28 g, 4.4 mmol), phenol (4.10 g, 44.0 mmol) and DSDBr (1.0 g, 2.2 mmol) was added to a clean, oven dried Schlenk tube, along with a magnetic follower. The Schlenk tube was sealed with a suba-seal, and purged with nitrogen several times. This was carried out by deoxygenating the tube via a high vacuum followed by flushing with nitrogen. Toluene (14.0 mL, 50% solids), MA (13.80 mL, 154.0 mmol) were added to the tube via a degassed syringe. Three freeze pump thaw cycles were then carried out using liquid nitrogen. The tube was placed in an oil bath at 25 °C ( $t = 0$ ), and Me<sub>6</sub>Tren (4.6 mL, 19.1 mmol) was added ( $T = 0$ ) and samples were taken every 10 minutes via a degassed syringe for conversion and molecular weight analysis. The reaction mixture was washed with toluene and stirred with basic alumina for 2 hours in order to remove copper salts. The solution was then passed through a celite filter and the solvent was removed on a rotary evaporator and the resulting polymer dissolved in a minimum THF. A total of 1 L of methanol and 20 mL of water was measured into to a beaker and was left stirring in a dry ice/acetone bath. The polymer was then slowly dropped into the beaker with a pipette, and once completely added, was left to stand for 20 minutes. The solvent was decanted off and polymer was then dried in a vacuum oven at 45 °C.

**Fig SI 2.1.** (i) First order kinetic plot for polymerisation (1). Last time point at 40 minutes.  
(ii) Graph showing linear increase of molecular weight ( $M_n$ ) against conversion, and molecular weight distribution ( $M_w/M_n$ ).

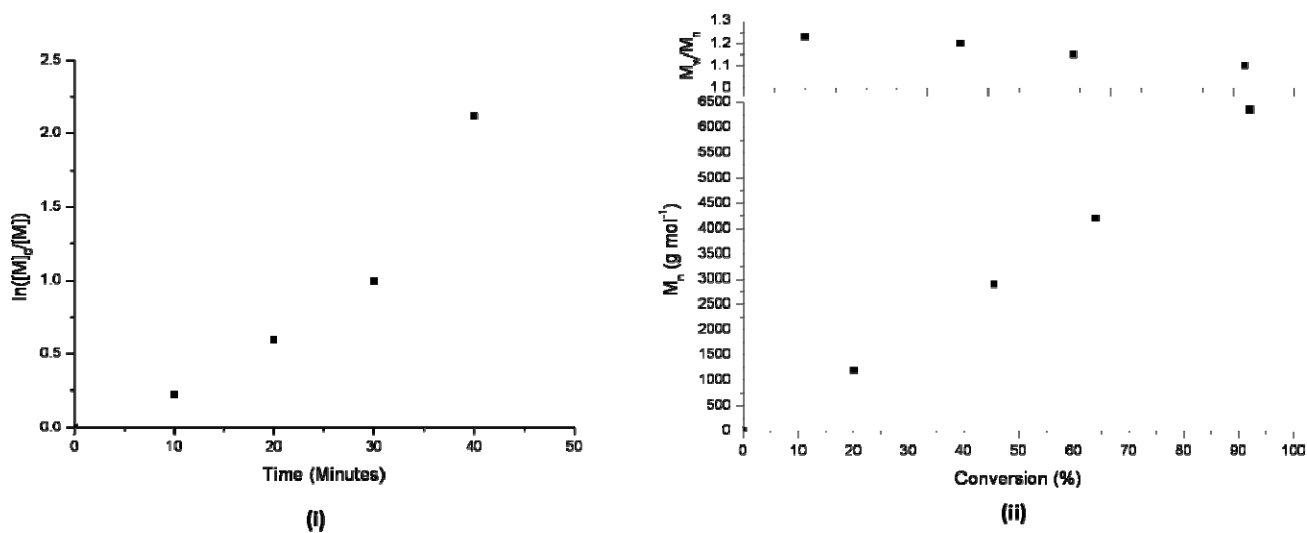

**Fig SI 2.2.**  $^1\text{H}$  NMR of *poly*[MA]-SS-*poly*[MA], (1).

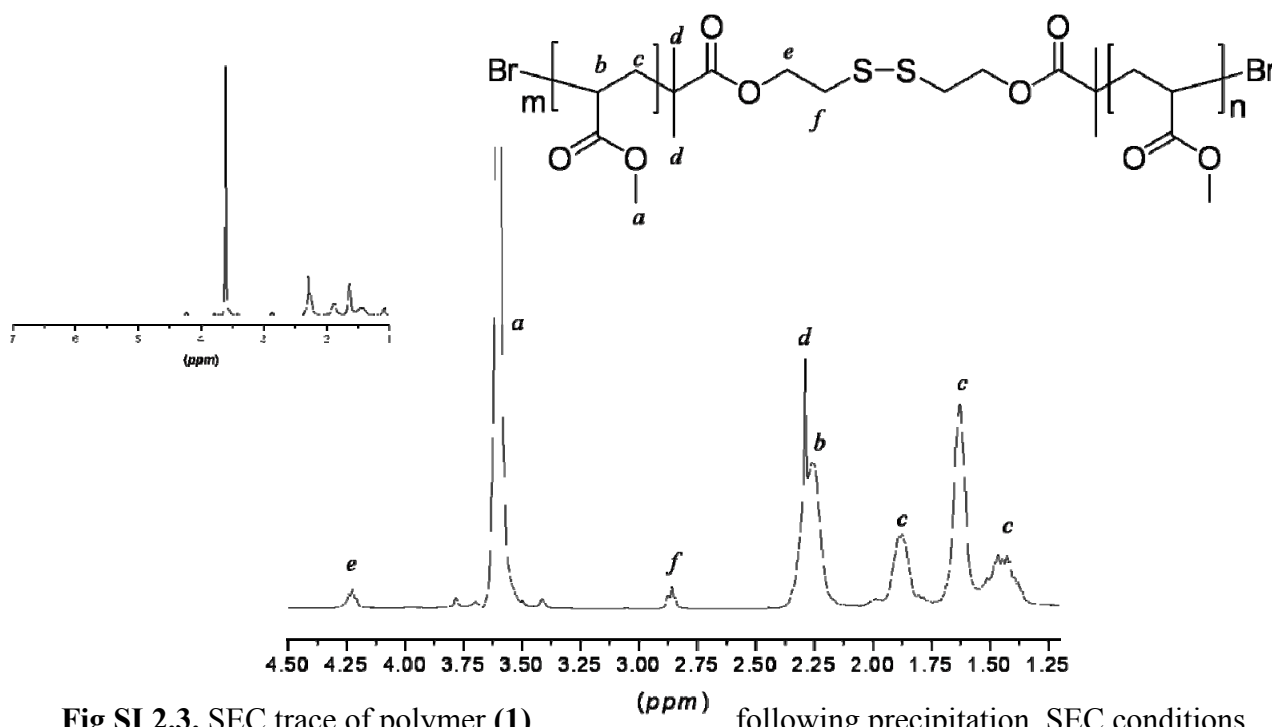

**Fig SI 2.3.** SEC trace of polymer (1) following precipitation, SEC conditions

described in general experimental section.

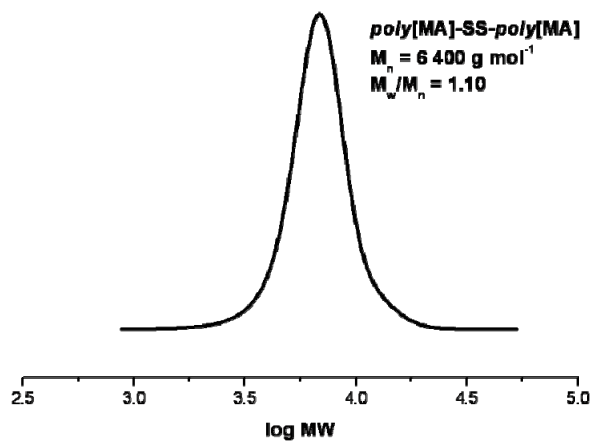

**Fig SI 2.4.** MALDI-ToF of polymer (**1**) conditions described in general experimental. Shown for degree of polymerisation DP 60 and DP 61

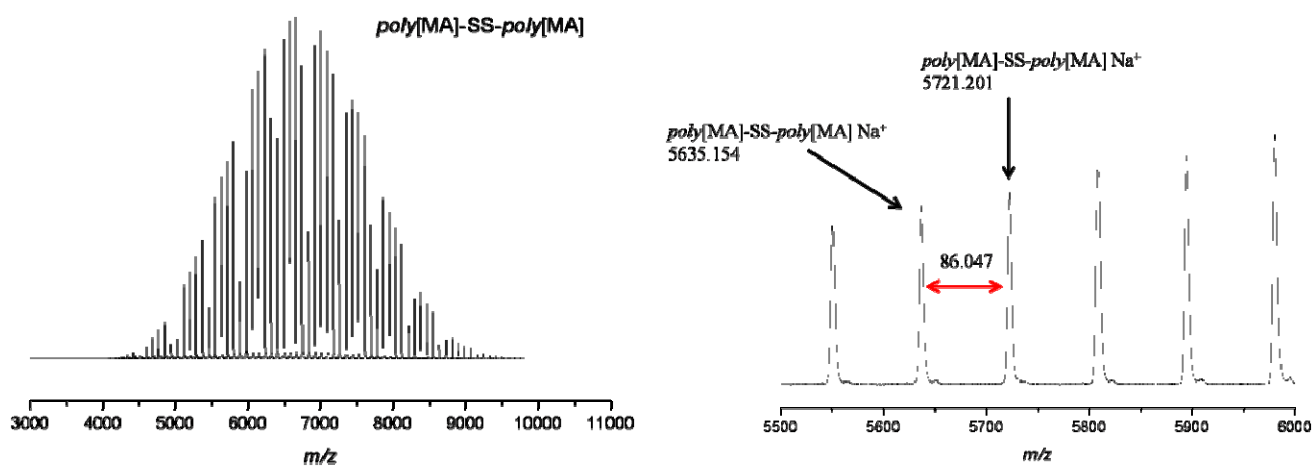

### (3) One-pot reduction/oxidation reaction of *poly*[MA]-SS-*poly*[MA], (1).

Polymer (1) (1.0 g, 0.15 mmol) was placed in a Schlenk tube with 20 mL THF, a magnetic follower, tributylphosphine ( $\text{Bu}_3\text{P}$ , 1.10 g, 7.8 mmol), and iron(III) chloride ( $\text{FeCl}_3$ , 1.5g, 7.8 mmol). Samples were taken at various time points, outlined in the SEC traces below. Samples were passed through a small neutral alumina column prior to NMR and GPC analysis.

**Fig SI 3.1.** Data for a one pot reduction/oxidation reaction of the *poly*[MA]-SS-*poly*[MA]. **(i)** General reaction scheme for the one pot redox reaction, indicating the protons of interest in the  $^1\text{H}$  NMR,  $\alpha$  and  $\beta$  to the sulphur in the DSDBr initiator. **(ii)**  $^1\text{H}$  NMR spectra of polymer (1) red, the reduced polymer (T = 1 hour) and the final polymer (T = 8 hours). We can follow the shift of the  $\text{CH}_2$   $\alpha$  to the sulphur from a triplet at  $\delta = 2.9$  ppm to a multiplet at  $\delta = 2.7$  ppm in the reduced form, blue proton in **(i)**. The protons shift back to  $\delta = 2.9$  ppm in the oxidised polymer. **(iii)** SEC data to support the cleavage and reformation processes. Conditions used as described in general experimental.

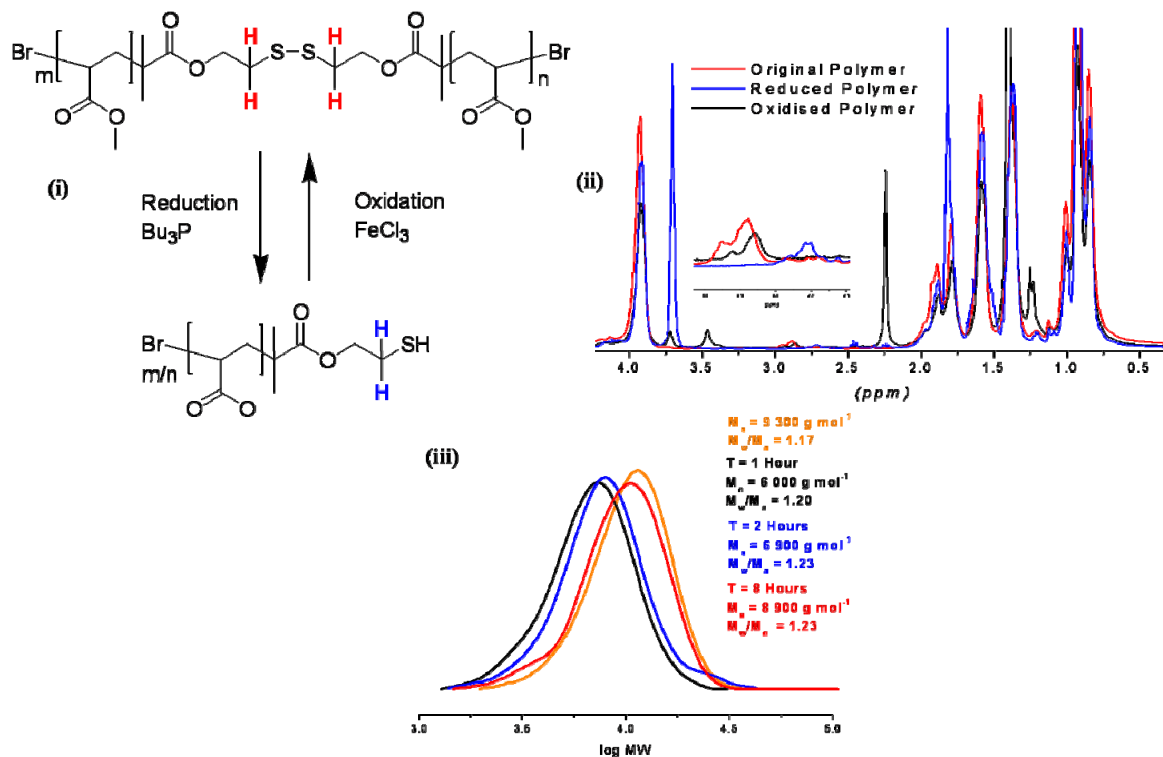

**(4) General procedure, described for the conjugation of hydroxyethyl acrylate.**

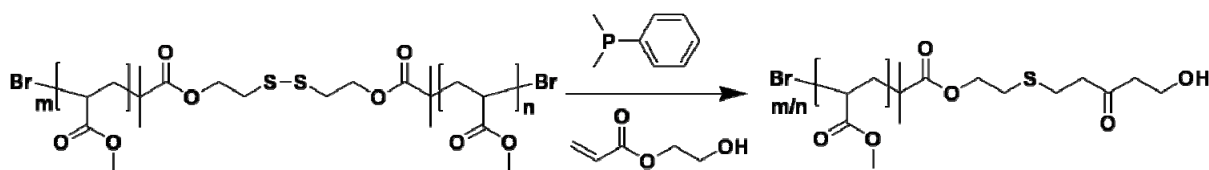

*Poly[MA]-SS-poly[MA]* (0.1 g, 0.015 mmol), 4.0 mL  $\text{CDCl}_3$  and hydroxyethyl acrylate (3.8 mg, 0.033 mmol), were added to a Schlenk tube, and sealed with a suba seal and degassed, as described in (1). A sample was taken via a degassed syringe for  $t = 0$  analysis by  $^1\text{H}$  NMR, SEC, and MALDI-TOF. Dimethylphenylphosphine (0.003 mL, 0.022 mmol) was added via a degassed syringe, and the reaction was left to stir at 25 °C for 12 hours, after which the remaining solution was analysed by  $^1\text{H}$  NMR, SEC, and MALDI-TOF.

**Fig SI 4.1.** SEC analysis of polymer (1) in black, and the conjugate (4), the expected halving of molecular weight is observed.

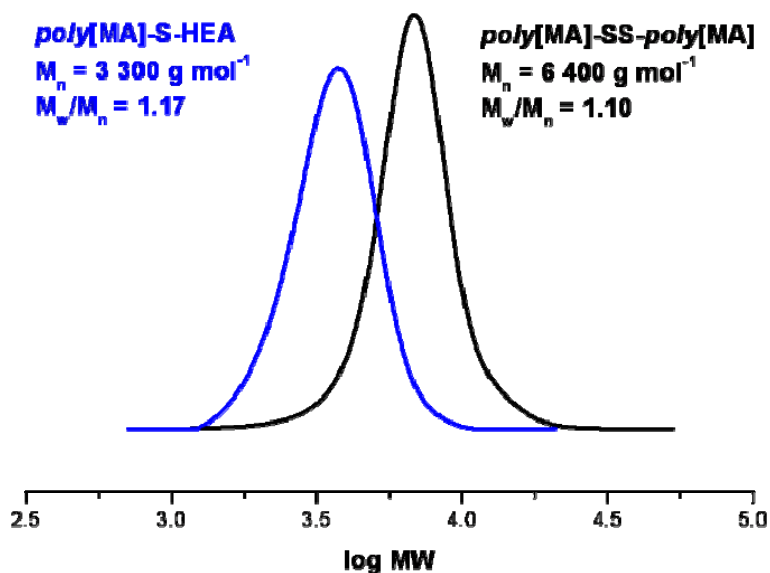

**SI FIG 4.2.** MALDI-TOF analysis of conjugate (4), shown for DP 30 and 31. Conditions used as described in general experimental.



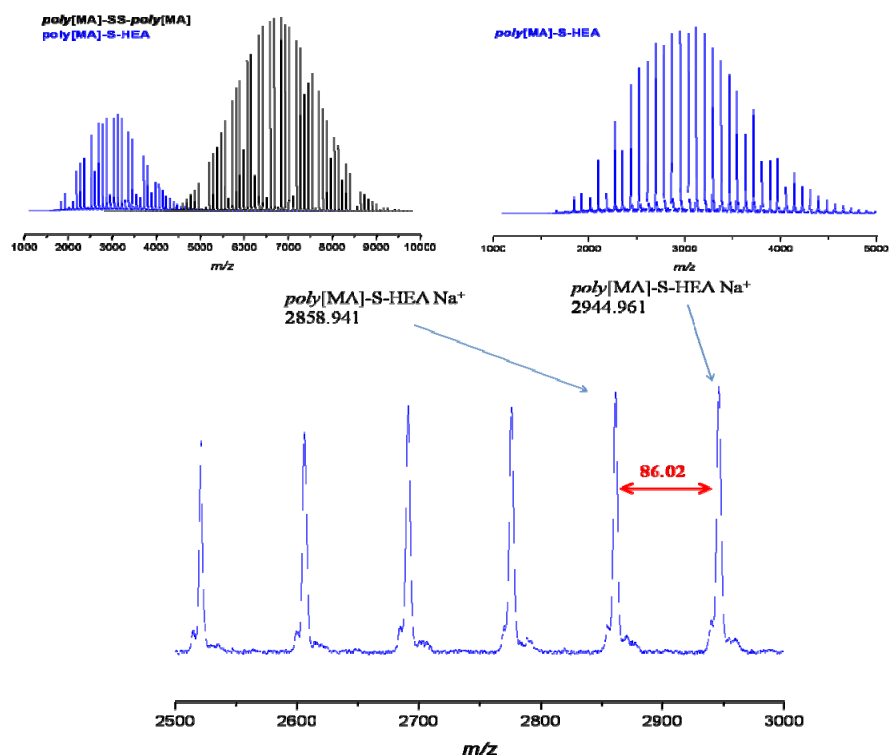

SI FIG 4.3. MALDI-ToF analysis of the conjugate (4), initial attempt. Conditions used as described in general experimental. Two distributions as not all the free thiol reacted. This is what you would expect to see if 100% conjugation was not achieved. We did not observe this for any other MALDI-TOF spectra.

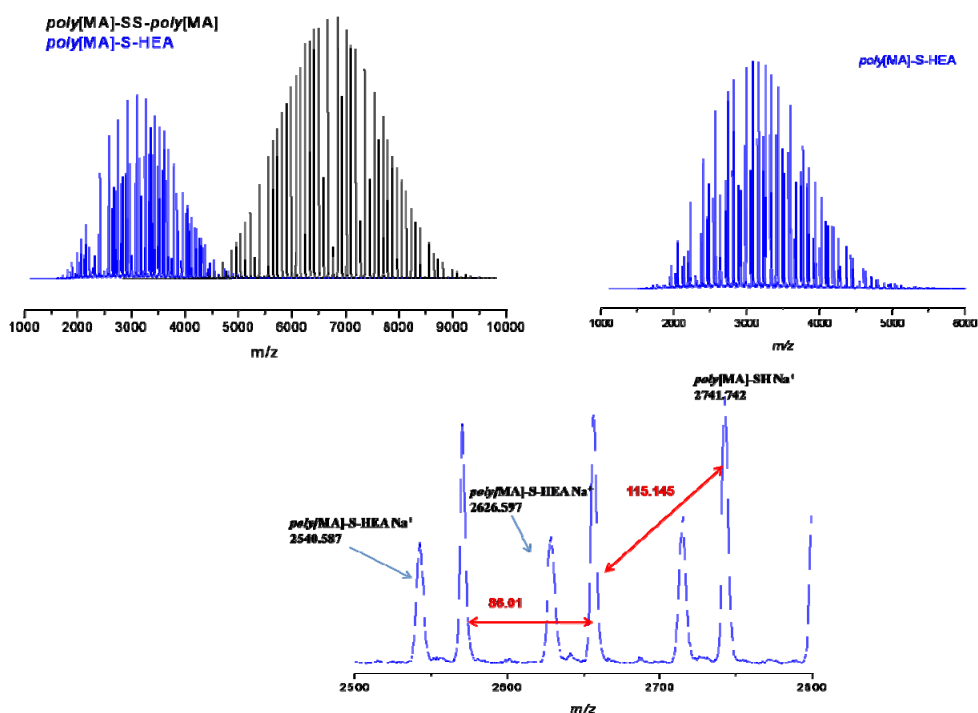

**SI FIG 4.4** GPC analysis of conjugate with some free thiol, bimodal distribution showing there is not 100% conjugation.

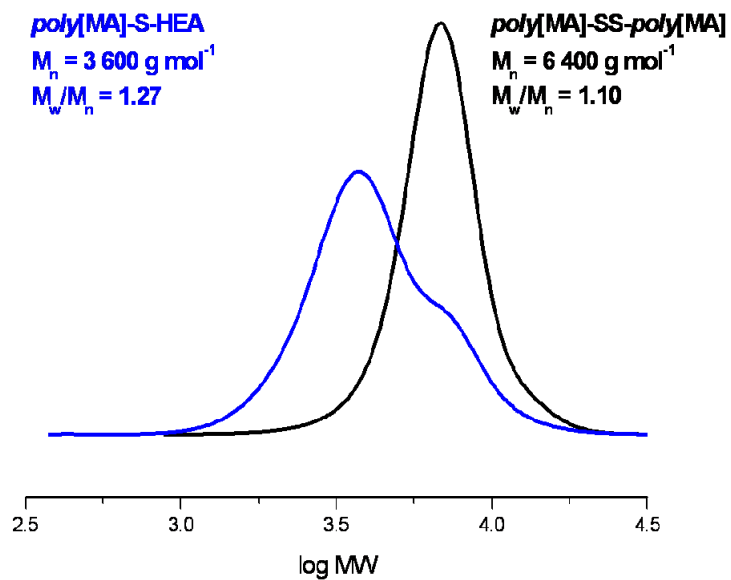

### (5) Conjugation of hostasol acrylate

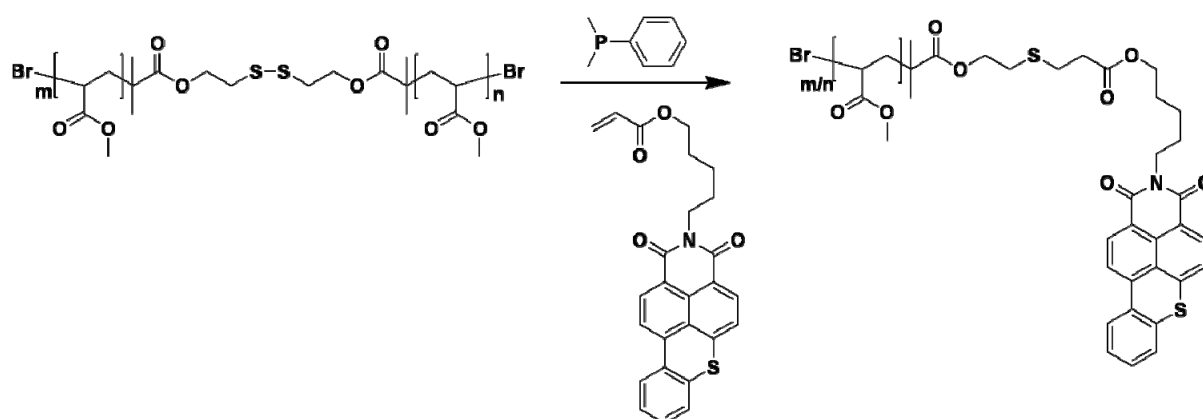

Procedure as (4), except hostasol acrylate (14.6 mg, 0.033 mmol) was used. MALDI-TOF data is reported in the main body of the publication.

**SI Fig 5.1** <sup>1</sup>H NMR indicates that complete conjugation has occurred, as previously described. Complete disappearance of the acrylate peaks post purification  $\delta = 6.45$  (d, 1H), 6.15 (m, 1H), 5.85 (d, 1H), whilst the hostasol aromatic protons remain at  $\delta = 8.55 - 8.20$  ppm. The CH<sub>2</sub> alpha to the sulphur in the original polymer shifts from  $\delta = 2.9$  ppm to a multiplet down field at  $\delta = 2.7$  ppm, from the chiral coupling of the CH<sub>2</sub>'s either side of the sulphur.

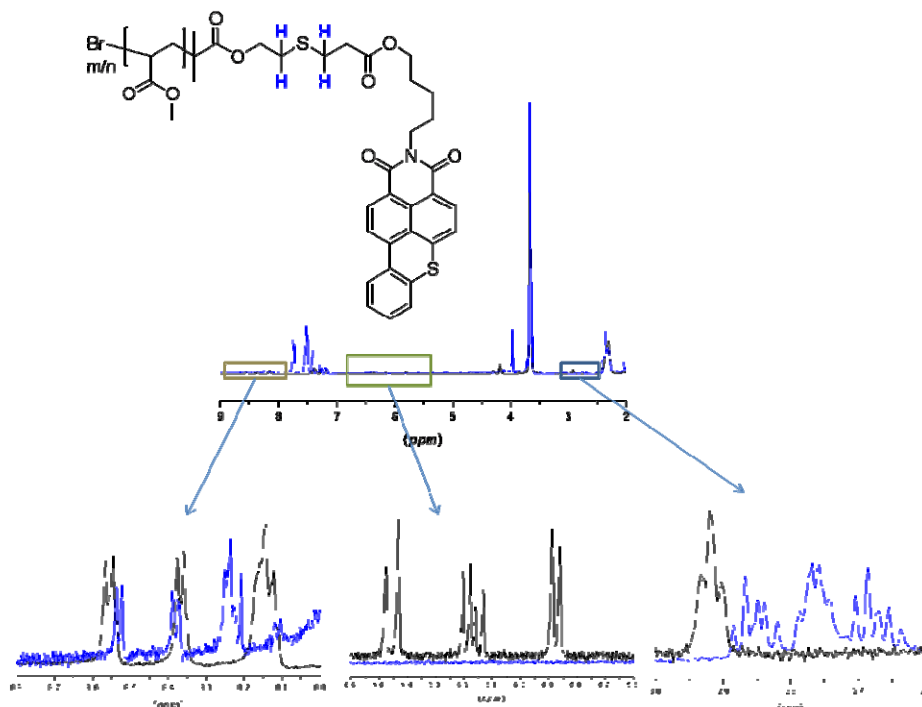

**SI Fig 5.2.** (i) SEC analysis of polymer (**1**) in black, and the conjugate (**5**). The expected halving of molecular weight is observed. (ii) UV SEC trace, run at 460 nm, showing further evidence that the conjugation was successful and the polymer is now fluorescently tagged.

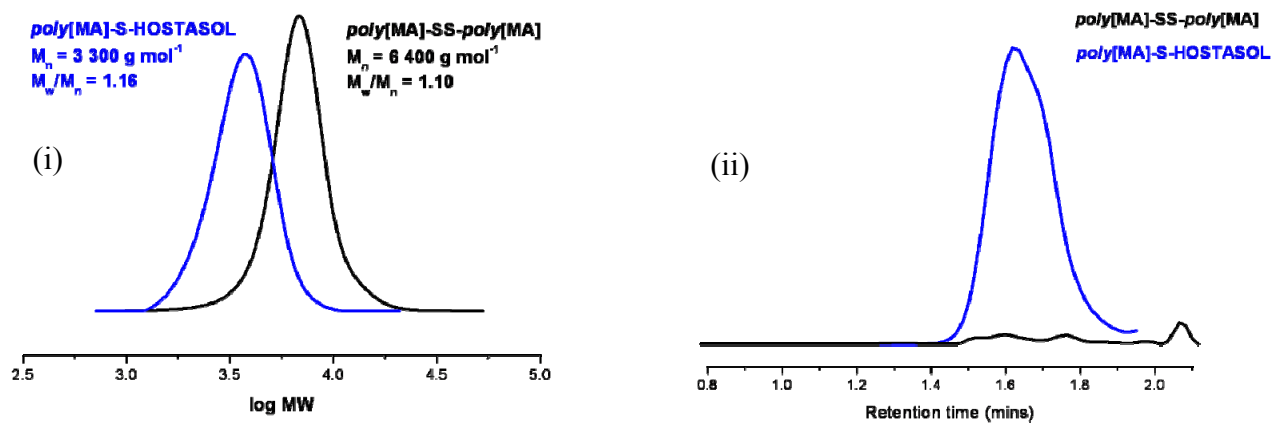

### (6) Conjugation of propargyl acrylate.

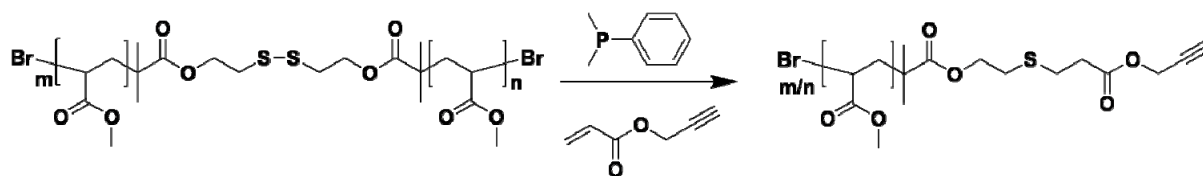

Procedure as (4), except propargyl acrylate (3.1 mg, 0.033 mmol) was used.

**SI Fig 6.1.** <sup>1</sup>H NMR indicates that complete conjugation has occurred, as previously described. Complete disappearance of the acrylate peaks post purification  $\delta = 6.45$  (d, 1H), 6.15 (m, 1H), 5.85 (d, 1H), whilst the propargyl CH<sub>2</sub>  $\alpha$  to the ester remains but shifts to  $\delta = 4.75$  ppm from  $\delta = 4.70$  ppm. The CH<sub>2</sub>  $\alpha$  to the sulphur in the original polymer shifts from  $\delta = 2.9$  ppm to a multiplet down field at  $\delta = 2.7$  ppm, from the chiral coupling of the CH<sub>2</sub> groups either side of the sulphur.

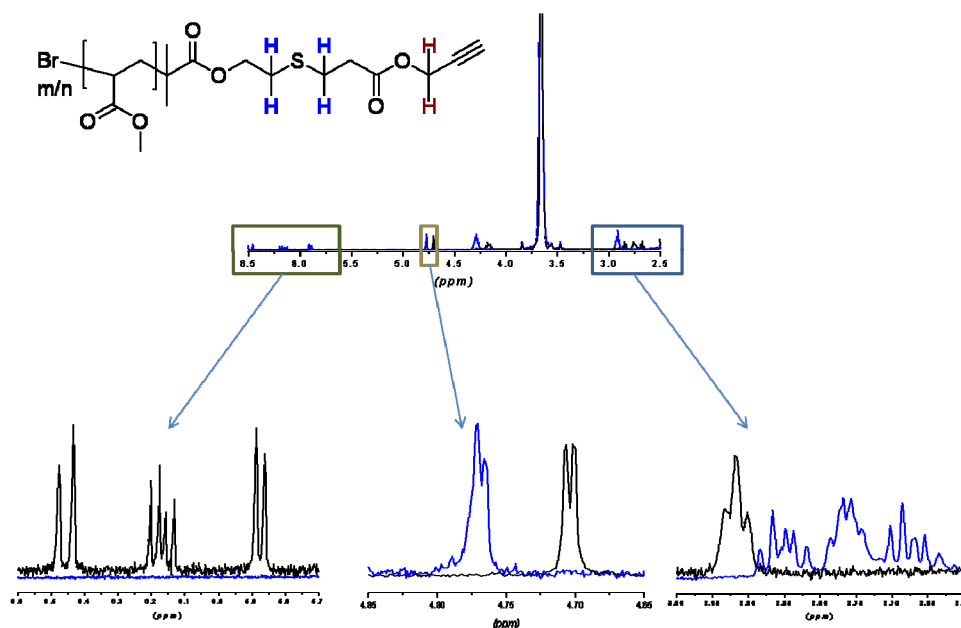

**SI Fig 6.2.** SEC analysis of polymer (**1**) in black, and the conjugate (**6**). The expected halving of molecular weight is observed.

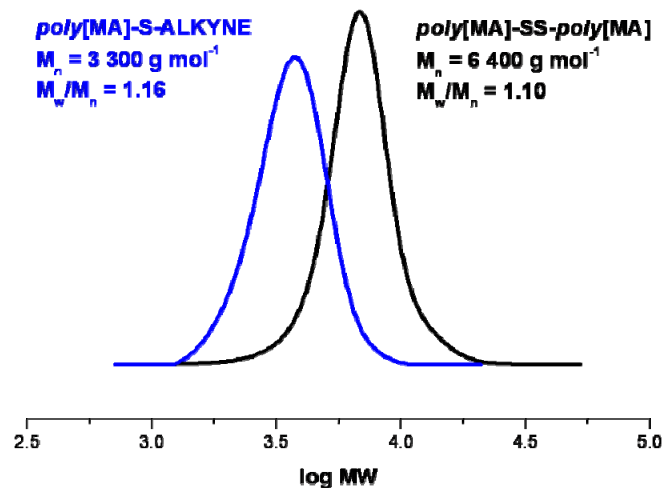

**SI Fig 6.3.** MALDI-ToF analysis of the conjugate (**6**), shown for DP 30 and 31. Both potassium and sodiated distributions observed. Conditions used as described in general experimental.

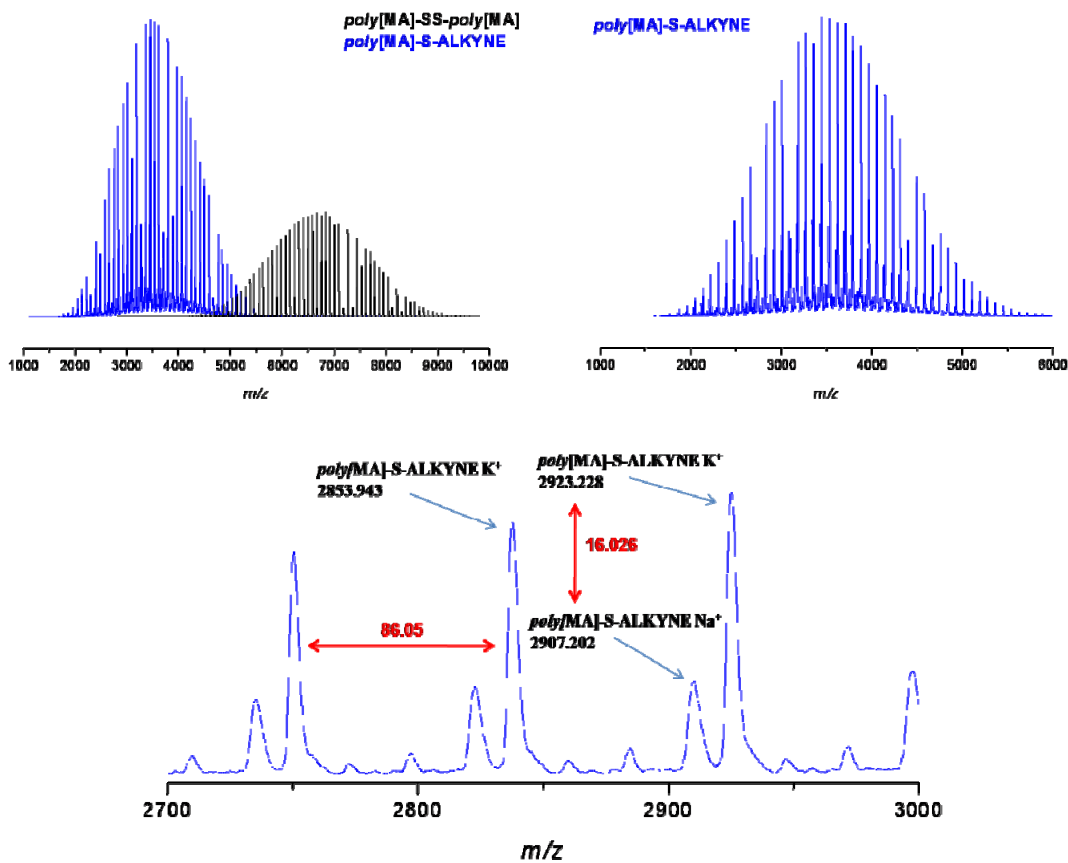

### (7) Conjugation of trifluoroethyl methacrylate

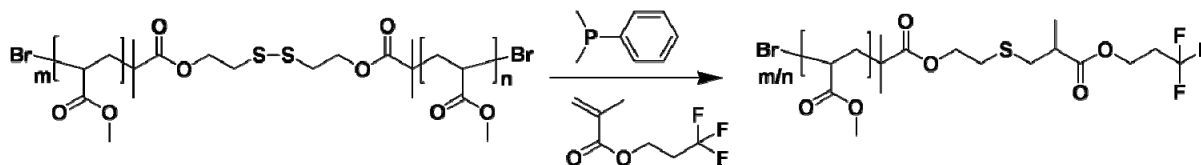

Procedure as (4), except trifluoroethyl methacrylate (6.0 mg, 0.033 mmol) was used

**SI Fig 7.1.**  $^1\text{H}$  NMR indicates that complete conjugation has occurred, as previously described. Complete disappearance of the methacrylate peaks post purification  $\delta = 6.19$  (d, 1H), 5.67 (d, 1H), whilst the  $\text{CH}_2$   $\alpha$  to the ester remain at  $\delta = 4.51$  ppm. The  $\text{CH}_2$   $\alpha$  to the sulphur in the original polymer shifts from  $\delta = 2.9$  ppm to a multiplet down field at  $\delta = 2.7$  ppm, from the chiral coupling of the  $\text{CH}_2$ 's either side of the sulphur atom.

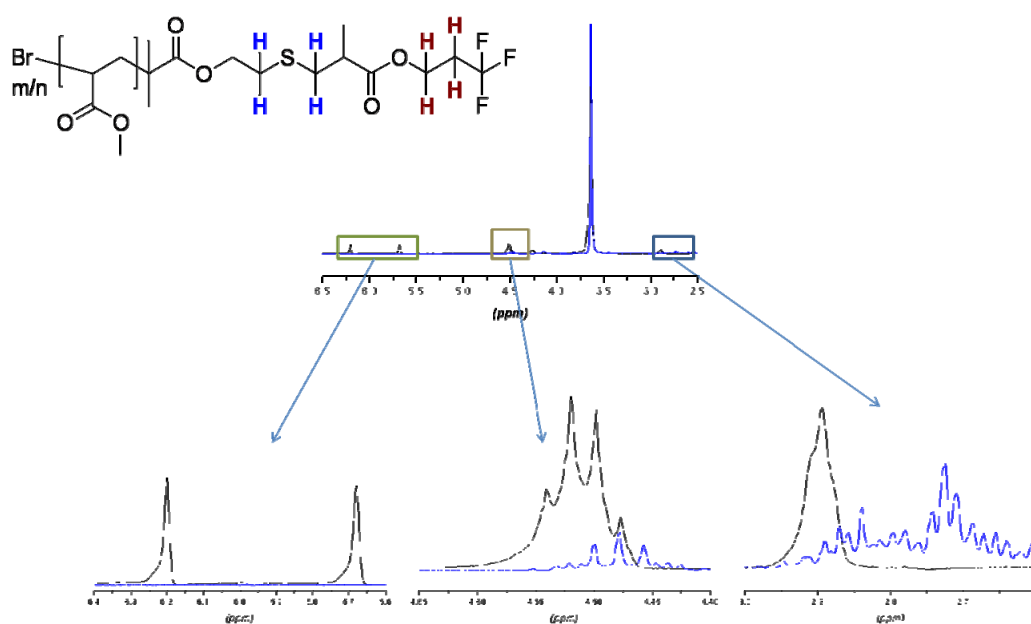

**SI Fig 7.2.**  $^{19}\text{F}$  NMR, calibrated to trifluoroacetic acid. A shift is seen in the  $^{19}\text{F}$  signal from  $\delta = -75.10$  to  $\delta = -75.28$  in the conjugate species.

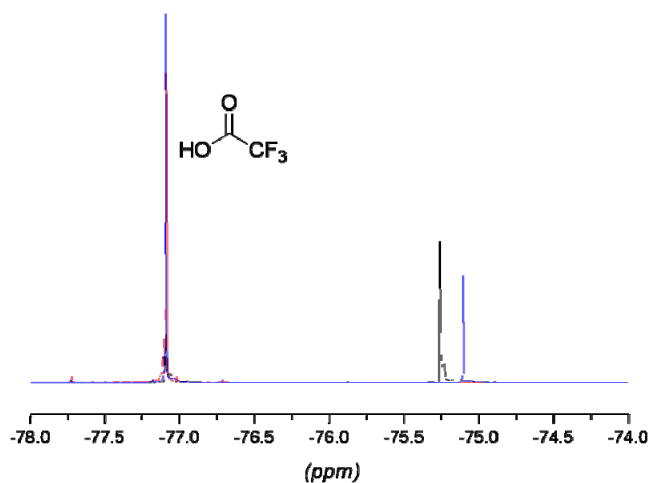

SI Fig 7.3. SEC analysis of polymer (1) in black, and the conjugate (7). The expected halving of molecular weight is observed

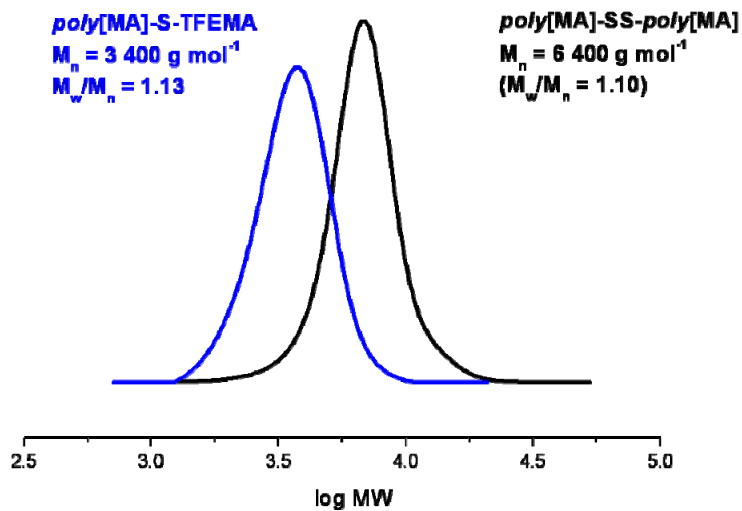

SI Fig 7.4. MALDI-ToF analysis of the conjugate (7), shown for DP 32 and 33.

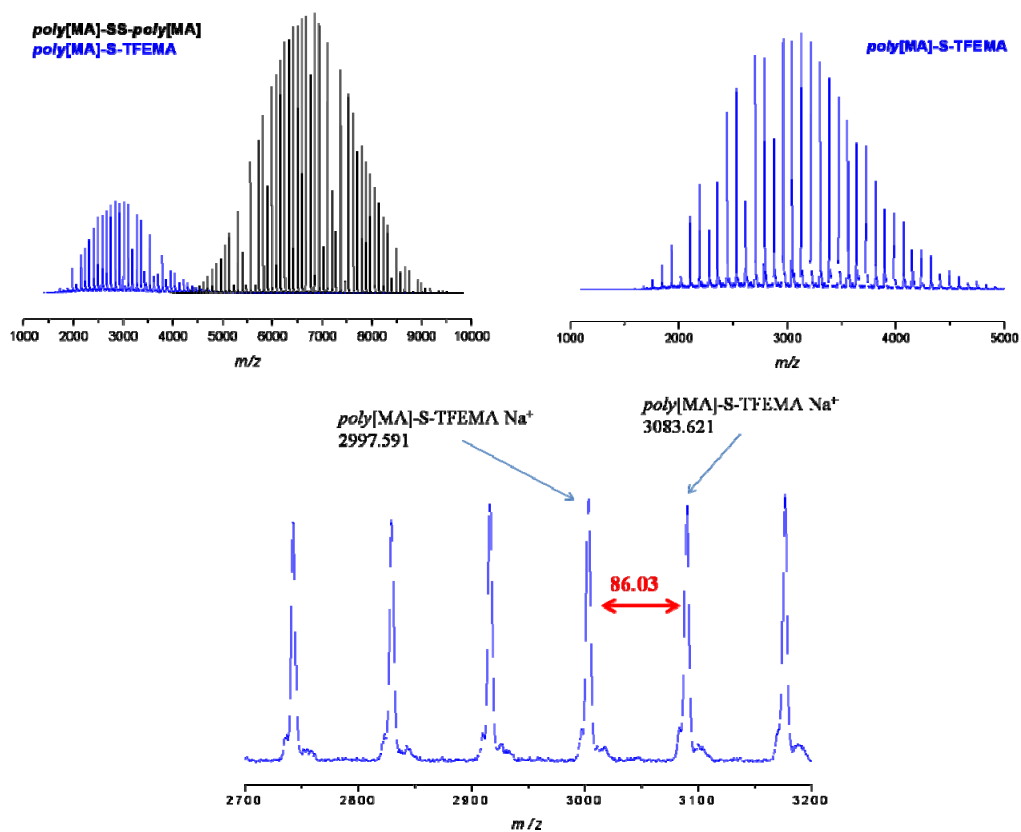



### (8) Conjugation on ethylene glycol methacrylate phosphate.

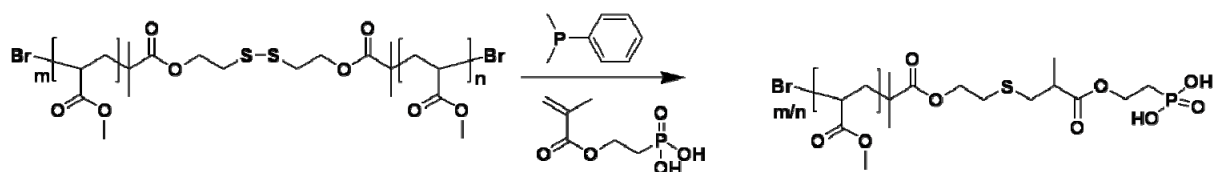

Procedure as (4), except ethylene glycol methacrylate phosphate (6.4 mg, 0.033 mmol) was used.

**SI Fig 8.1.**  $^1\text{H}$  NMR indicates that complete conjugation has occurred, as previously described. Complete disappearance of the methacrylate peaks post purification  $\delta = 6.19$  (d, 1H), 5.67 (d, 1H), whilst the  $\text{CH}_2$   $\alpha$  to the ester remains but shifts from at  $\delta = 4.3$  ppm to  $\delta = 4.5$  ppm. The  $\text{CH}_2$   $\alpha$  to the sulphur in the original polymer shifts from  $\delta = 2.9$  ppm to a multiplet down field at  $\delta = 2.7$  ppm, from the chiral coupling of the  $\text{CH}_2$ 's either side of the sulphur.

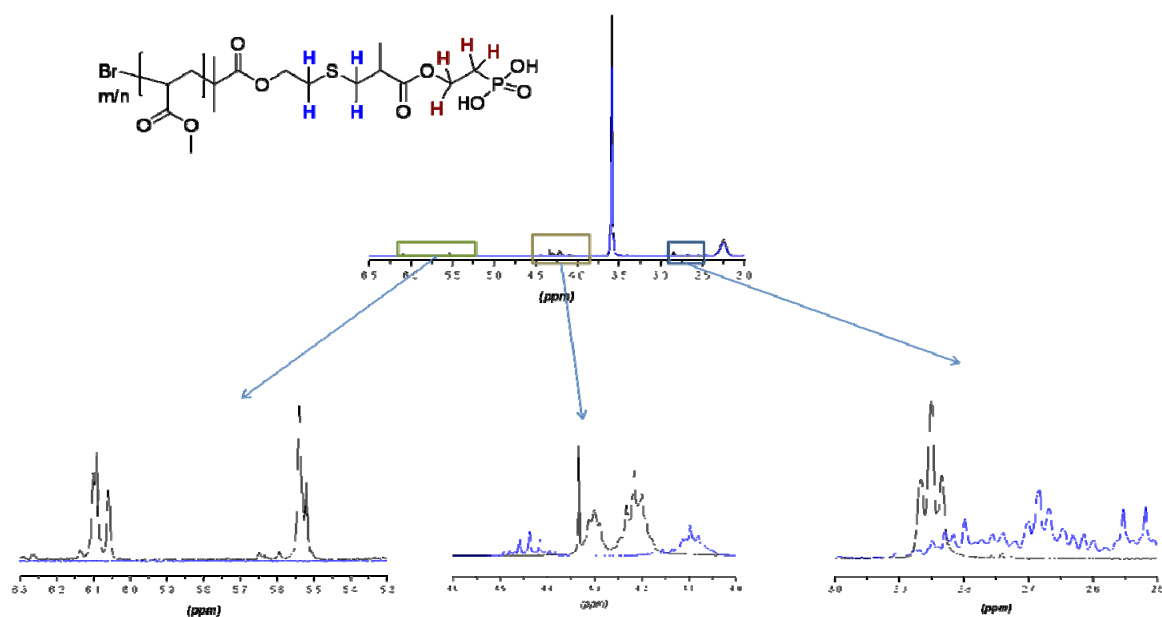

SI Fig 8.2. SEC analysis of polymer (1) in black, and the conjugate (8). The expected halving of molecular weight is observed

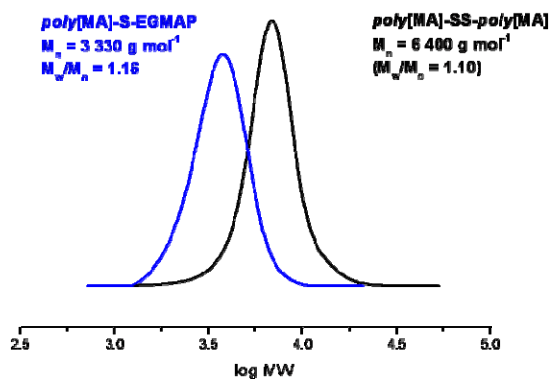

SI fig 8.3. MALDI-ToF analysis of the conjugate (8), shown for DP 32 and 34.

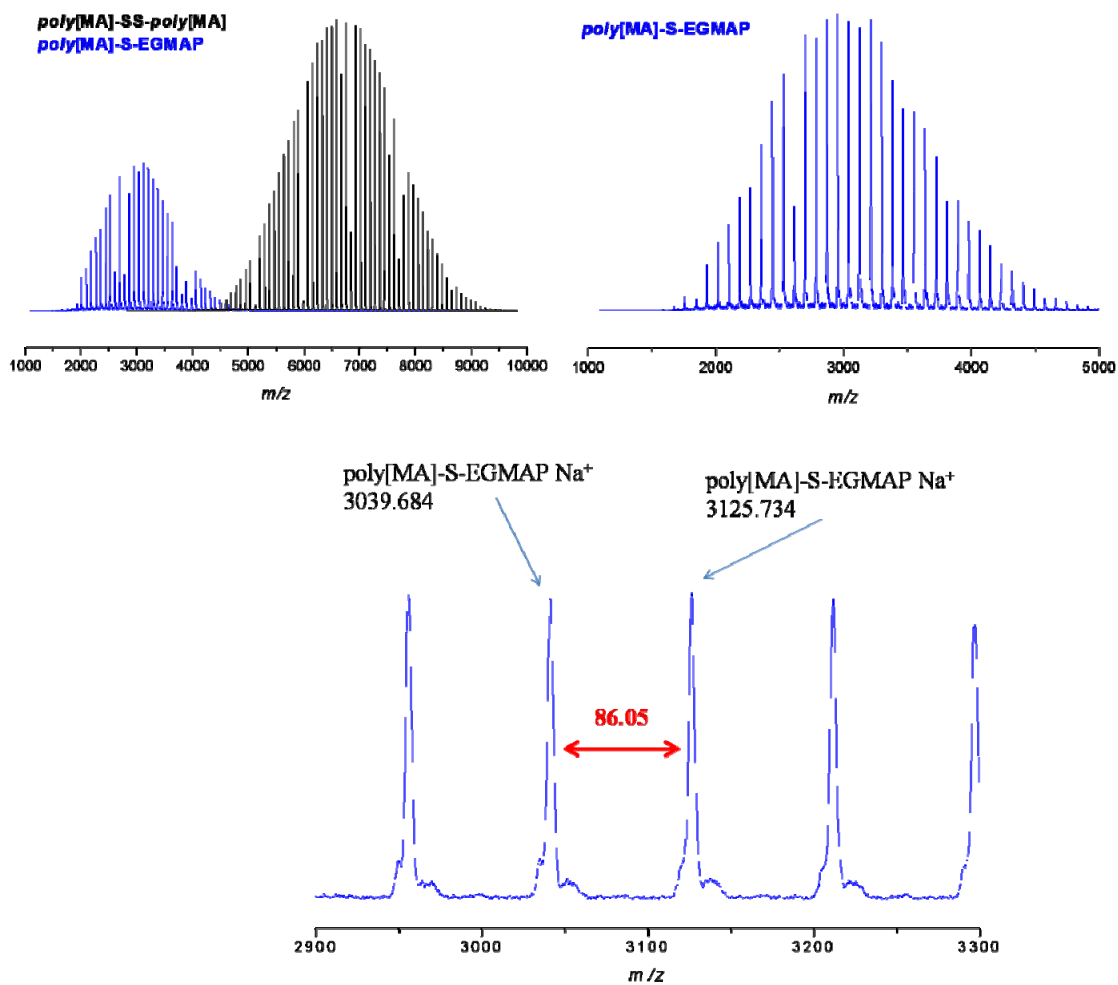

### (9) Conjugation of methacrylamide

Procedure as (4), except methacrylamide (2.8 mg, 0.033 mmol) was used.

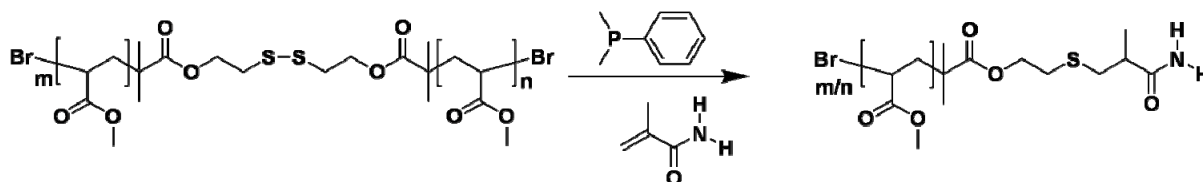

**SI Fig 9.1**  $^1\text{H}$  NMR indicates that complete conjugation has occurred, as previously described. Complete disappearance of the methacrylate peaks post purification  $\delta = 6.19$  (d, 1H), 5.67 (d, 1H). The  $\text{CH}_2$   $\alpha$  to the sulphur in the original polymer shifts from  $\delta = 2.9$  ppm to a multiplet down field at  $\delta = 2.7$  ppm, from the chiral coupling of the  $\text{CH}_2$ 's either side of the sulphur. No detectable end groups are available in the functional end group.

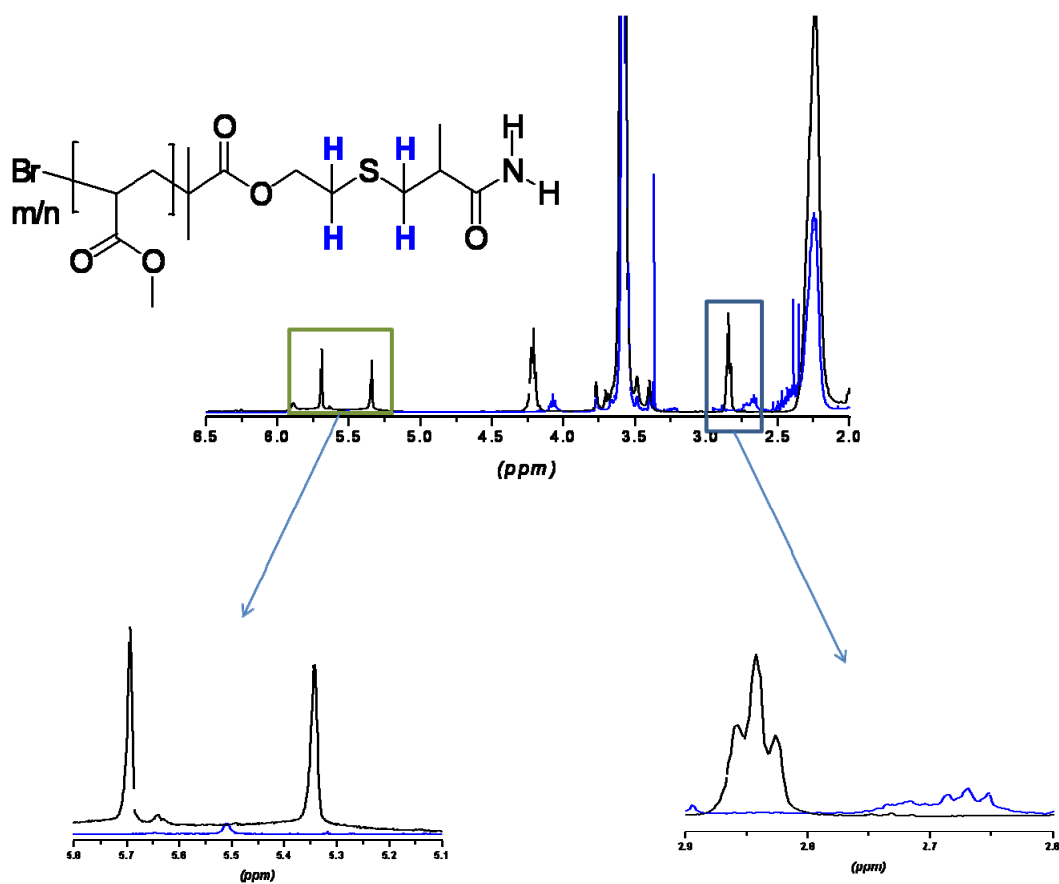

SI Fig 9.2. SEC analysis of polymer (1) in black, and the conjugate (9). The expected halving of molecular weight is observed

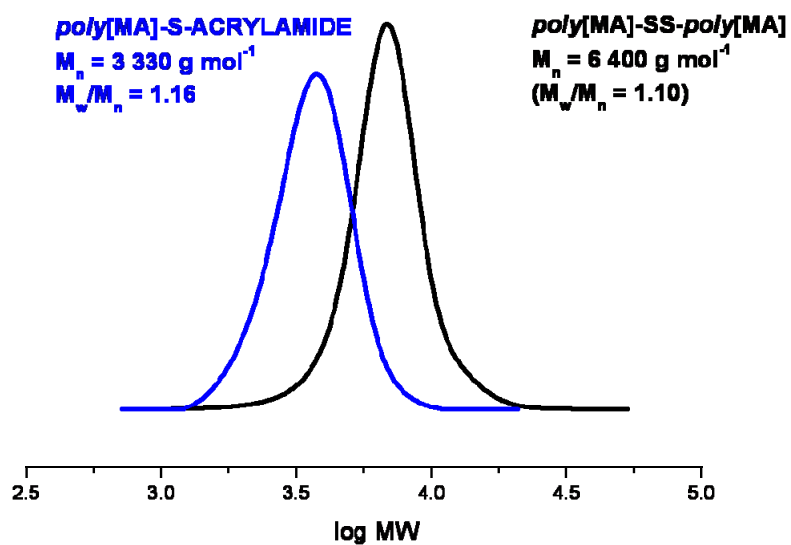

SI Fig 9.3. MALDI-ToF analysis of the conjugate (9), shown for DP 31 and 32.

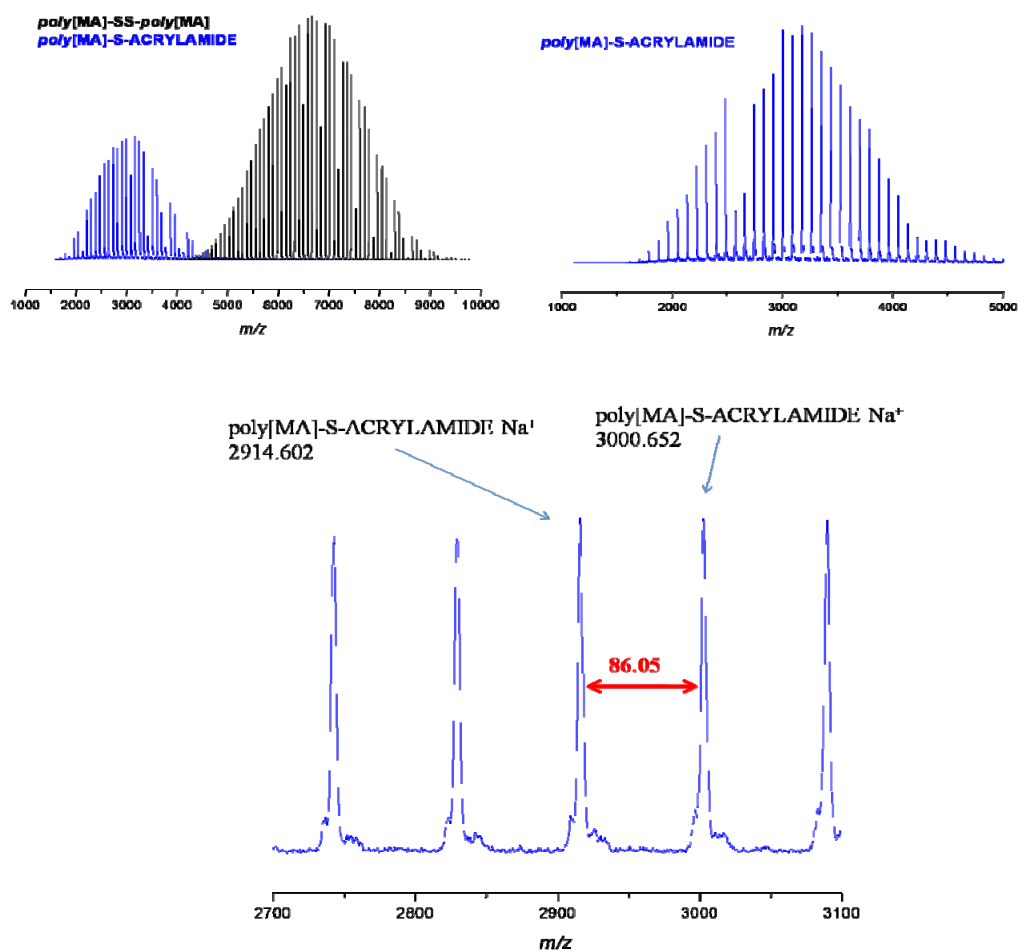

### (10) Conjugation of styrene

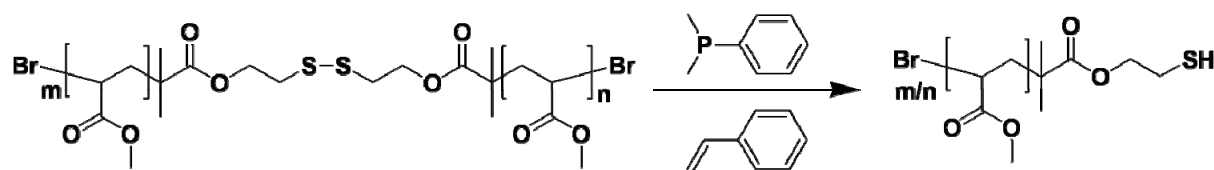

Procedure as (4), except styrene (3.4 mg, 0.033 mmol) was used.

**SI Fig 10.1.** <sup>1</sup>H NMR indicates that no conjugation occurred. The vinyl peaks post purification  $\delta = 5.15$  and  $\delta = 2.7$  remain. The CH<sub>2</sub>  $\alpha$  to the sulphur in the original polymer shifts from  $\delta = 2.9$  ppm to a multiplet down field at  $\delta = 2.7$  ppm, from the chiral coupling of the CH<sub>2</sub>'s either side of the sulphur, which shows the polymer has reduced, but no conjugation has proceeded.

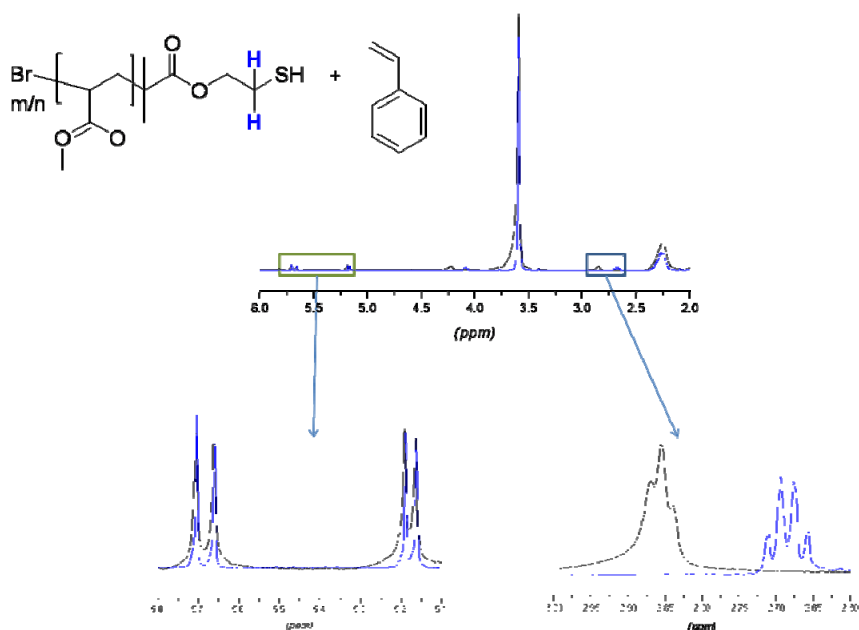

SI Fig 10.2. SEC analysis of polymer (1) in black, and the reduced polymer (10). The expected halving of molecular weight is observed

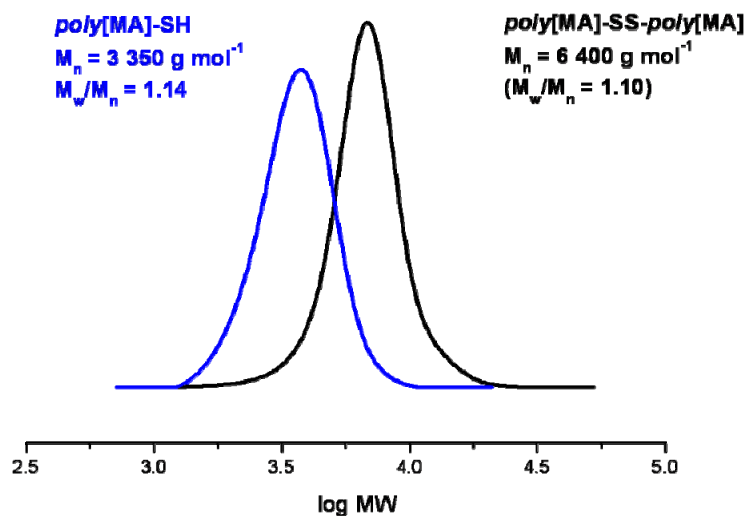

SI Fig 10.3. MALDI-ToF analysis of the reduced *poly[MA]-SS-poly[MA]*, shown for DP 29 and 30.

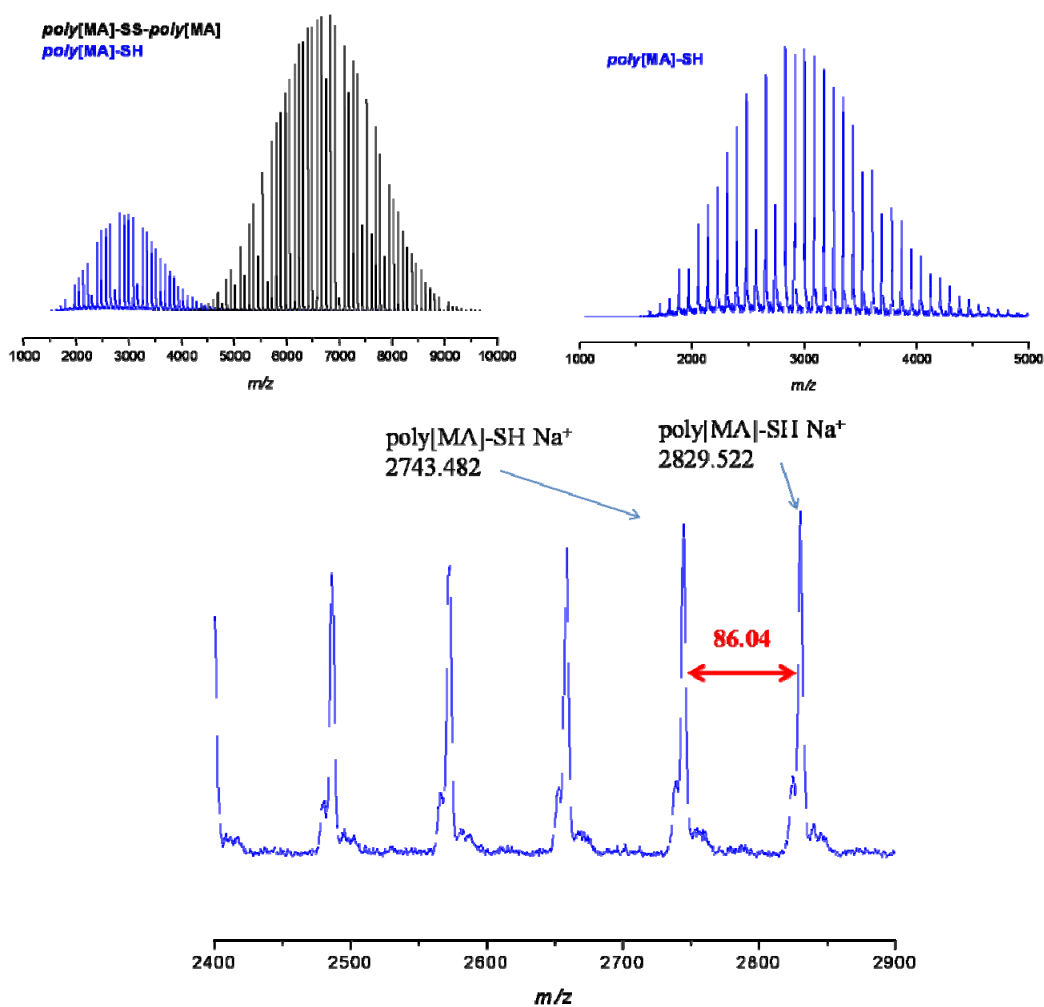

Supplement: c0cc02395g.pdf [file c0cc02395g.pdf]
